# Supplementary material for: Acetylenic Synthetic Betulin Derivatives Inhibit Akt and Erk Kinases Activity, Trigger Apoptosis and Suppress Proliferation of Neuroblastoma and Rhabdomyosarcoma Cell Lines
Source: MDPI journal article supplement (doi:10.3390/ijms222212299), 2021-11-14
Supplement: s1 [file s1]

## Supplementary Materials

# Acetylenic Synthetic Betulin Derivatives Inhibit Akt and Erk Kinases Activity, Trigger Apoptosis and Suppress Proliferation of Neuroblastoma and Rhabdomyosarcoma Cell Lines

Sylvia K. Król <sup>1,\*</sup>, Ewa Bębenek <sup>2</sup>, Magdalena Dmoszyńska-Graniczka <sup>1</sup>, Adrianna Sławińska-Brych <sup>3</sup>, Stanisław Boryczka <sup>2</sup> and Andrzej Stepulak <sup>1</sup>

<sup>1</sup> Department of Biochemistry and Molecular Biology, Faculty of Medicine, Medical University of Lublin, Chodźki 1, 20-093 Lublin, Poland; magdalena.dmoszynska-graniczka@umlub.pl (M.D.-G.); andrzej.stepulak@umlub.pl (A.S.)

<sup>2</sup> Department of Organic Chemistry, Faculty of Pharmaceutical Sciences in Sosnowiec, Medical University of Silesia, Jagiellońska 4, 41-200, Sosnowiec, Poland; ebebenek@sum.edu.pl (E.B.); boryczka@sum.edu.pl (S.B.)

<sup>3</sup> Department of Cell Biology, Faculty of Biology and Biotechnology, Institute of Biological Sciences, Maria Curie-Skłodowska University, Akademicka 19, 20-033 Lublin, Poland; adrianna.slawska-brych@poczta.umcs.lublin.pl

\* Correspondence: sylwia\_krol15@wp.pl

## LIST OF CONTENTS

**Figure S1.**  $^1\text{H}$ -NMR spectrum for EB5 (600 MHz,  $\text{CDCl}_3$ )

**Figure S2.**  $^{13}\text{C}$ -NMR spectrum for EB5 (150 MHz,  $\text{CDCl}_3$ )

**Figure S3.**  $^1\text{H}$ -NMR spectrum for EB25/1 (600 MHz,  $\text{CDCl}_3$ )

**Figure S4.**  $^{13}\text{C}$ -NMR spectrum for EB25/1 (150 MHz,  $\text{CDCl}_3$ )

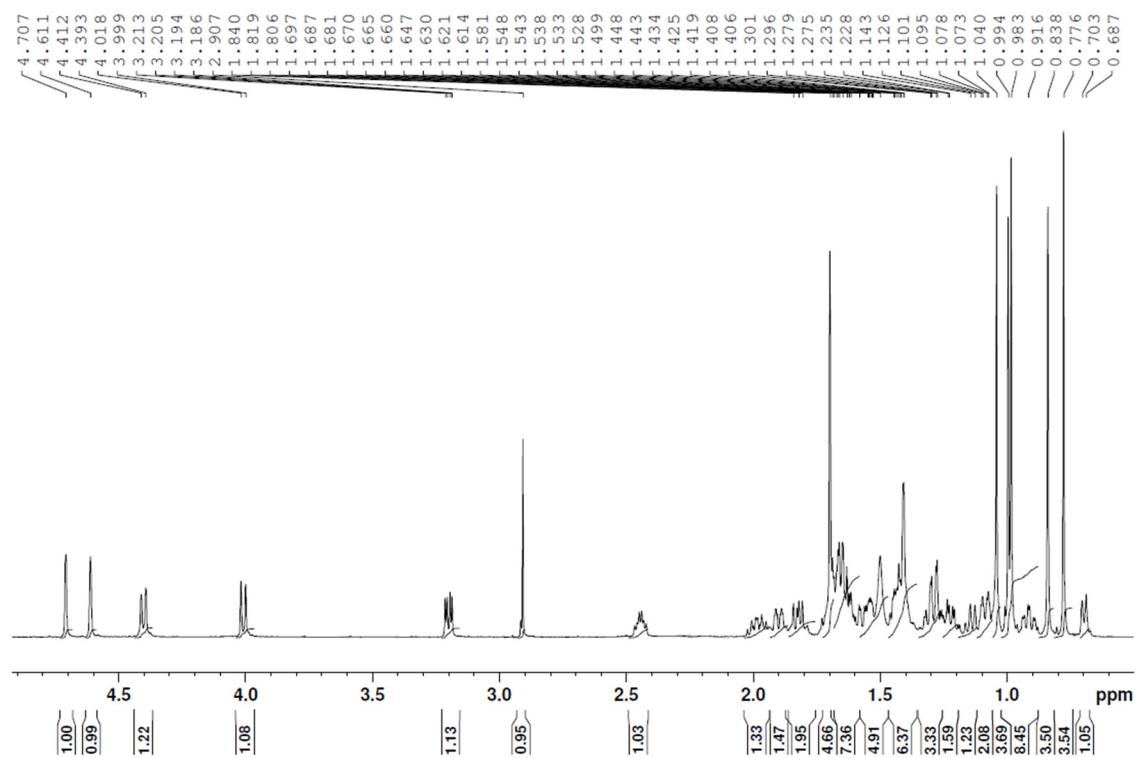

**Figure S1.** <sup>1</sup>H-NMR spectrum for EB5 (600 MHz, CDCl<sub>3</sub>)

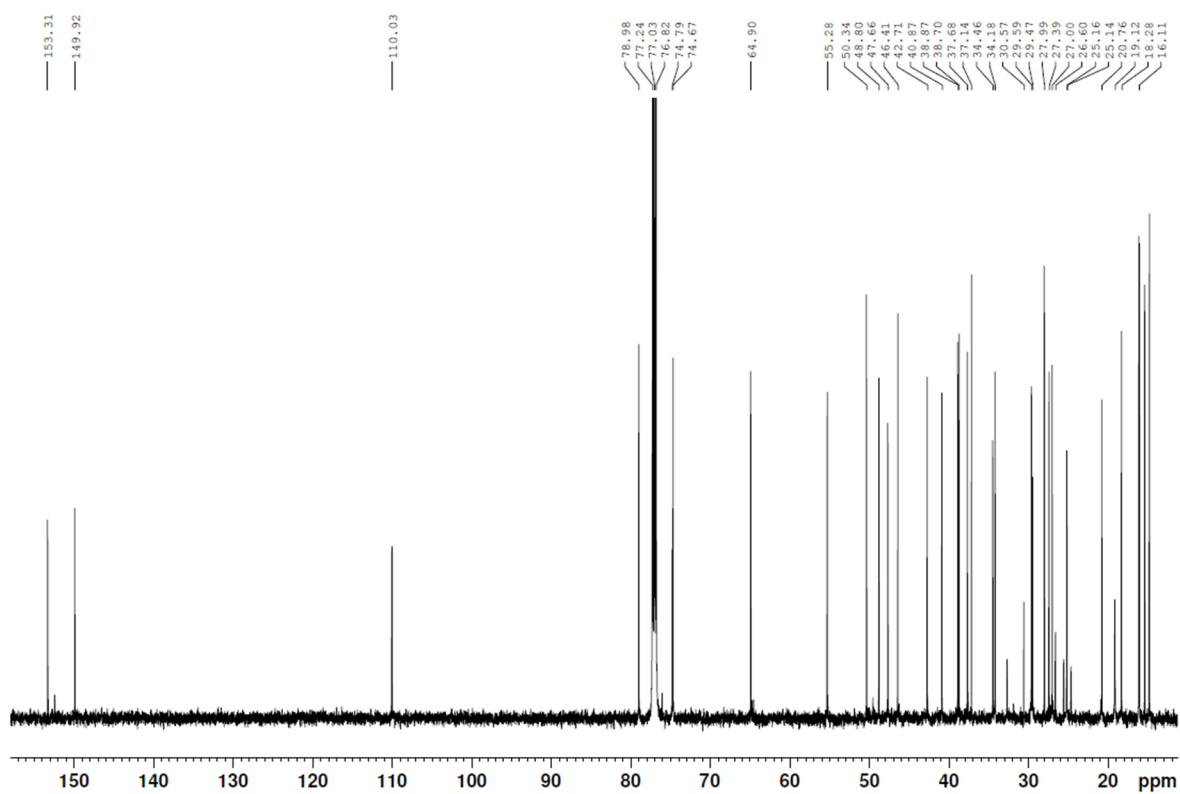

**FigureS2.**  $^{13}\text{C}$ -NMR spectrum for EB5 (150 MHz,  $\text{CDCl}_3$ )

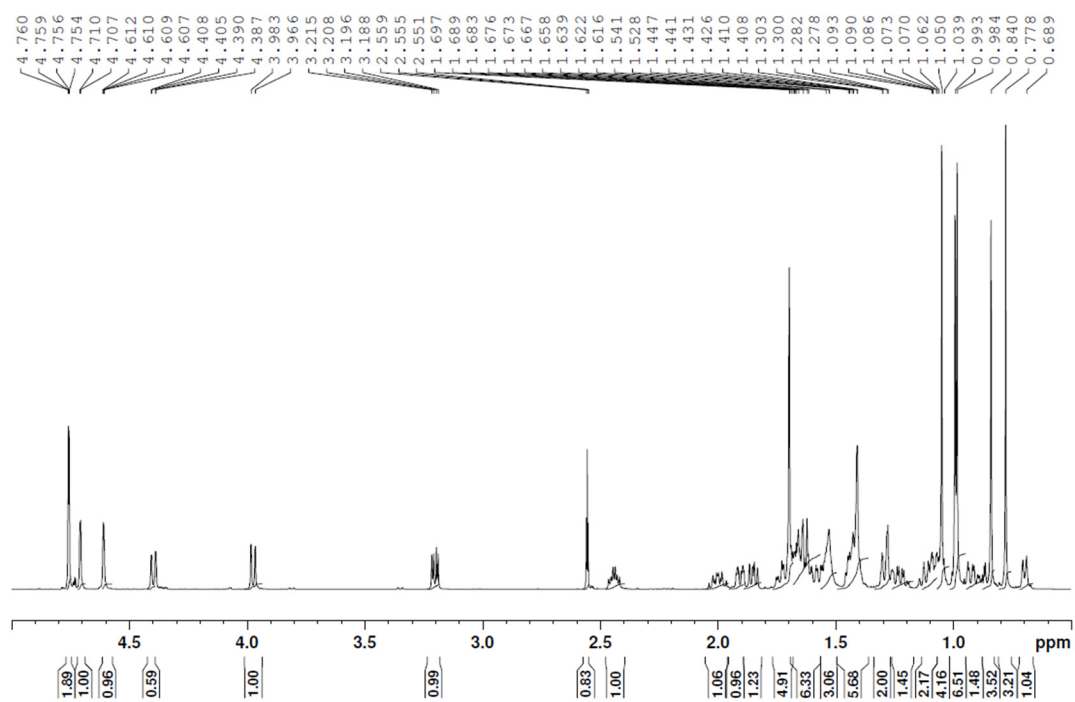

**Figure S3.**  $^1\text{H}$ -NMR spectrum for EB25/1 (600 MHz,  $\text{CDCl}_3$ )

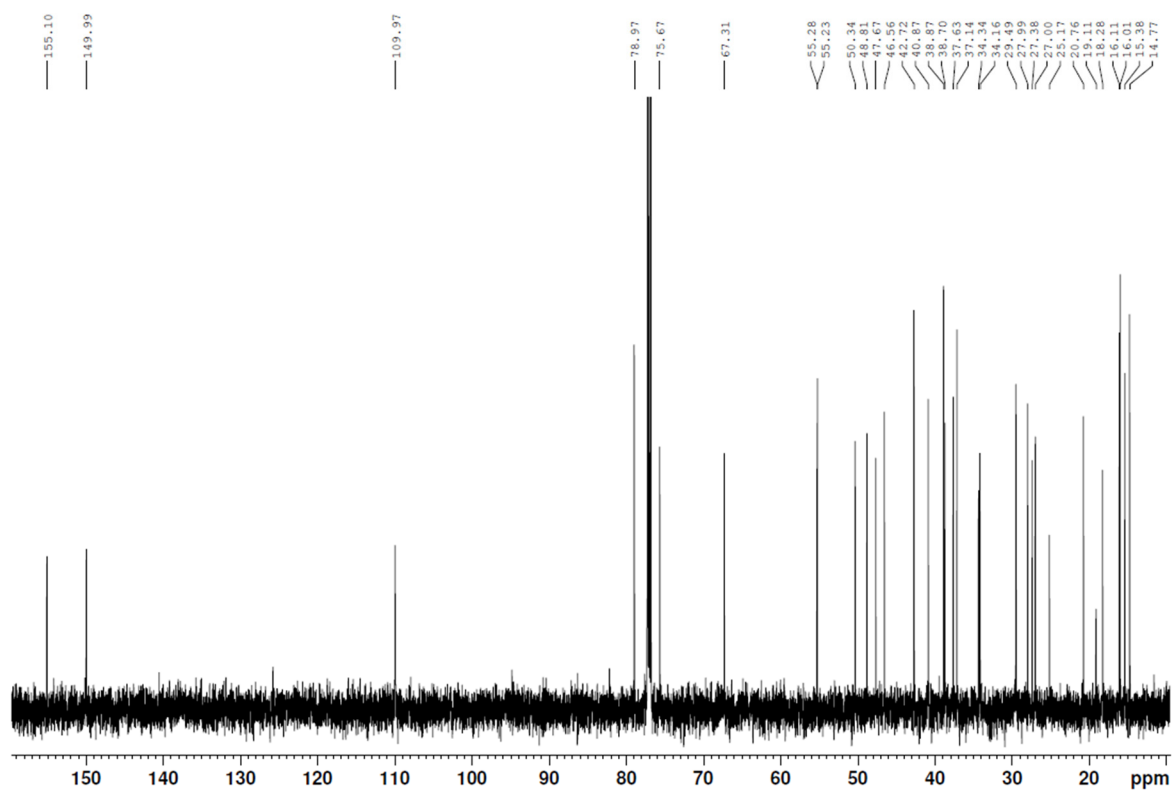

**Figure S4.**  $^{13}\text{C}$ -NMR spectrum for EB25/1 (150 MHz,  $\text{CDCl}_3$ )
